# Supplementary material for: TGF‐β–responsive CAR‐T cells promote anti‐tumor immune function
Source: PubMed Central journal article supplement (PMC6063867; doi:10.1002/btm2.10097), 2018-07-27

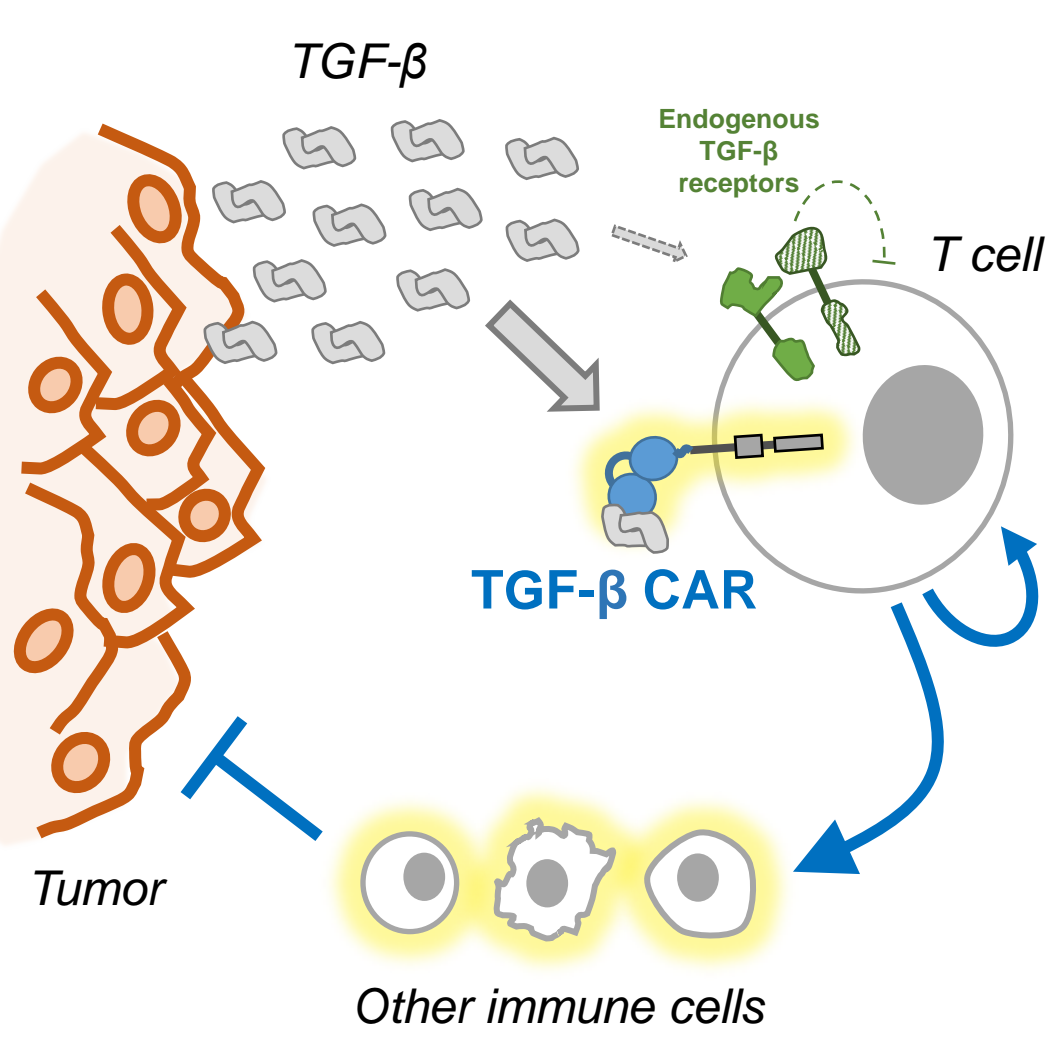

Supplement: BTM2-3-75-s001.pdf [file BTM2-3-75-s001.pdf]
